# Supplementary material
Source: publisher site journal article supplement (https://www.dovepress.com/article/254870)
Supplement: Supplementary file 1 [file get_supplementary_file.php]

| **Table S1. Primary antibodies and PCR primers** | | |
| --- | --- | --- |
| **Primary antibodies for IHC** | | |
| HNRNPC | Abcam | Rabbit Anti-HNRNPC antibody (ab75822) |
| ALKBH5 | Abcam | Rabbit Anti-ALKBH5 antibody (ab244296) |
| **PCR primers** | | |
| HNRNPC | Forward | GGAGATGTACGGGTCAGTAACA |
|  | Reverse | CCCGAGCAATAGGAGGAGGA |
| ALKBH5 | Forward | ATGCACCCCGGTTGGAAAC |
|  | Reverse | GACTTGCGCCAGTAGTTCTCA |
| GAPDH | Forward | TGACTTCAACAGCGACACCCA |
|  | Reverse | CACCCTGTTGCTGTAGCCAAA |
